# Supplementary material for: Weaving a two-dimensional fishing net from titanoniobate nanosheets embedded with Fe3O4nanocrystals for highly efficient capture and isotope labeling of phosphopeptides
Source: Royal Society of Chemistry journal article supplement (doi:10.1039/c4nr07041k), 2015-01-01
Supplement: c4nr07041k1.pdf [file c4nr07041k1.pdf]

Electronic Supplementary Information for

**Weaving a two-dimensional fishing net of  
 $\text{Fe}_3\text{O}_4$  nanocrystals-embedded titanoniobate  
nanosheet for highly efficient capture and  
isotope labeling of phosphopeptides**

*Xueqin Chen, Siyuan Li, Xiaoxia Zhang, Qianhao Min\*, and Jun-Jie Zhu*

State Key Laboratory of Analytical Chemistry for Life Science, School of Chemistry and  
Chemical Engineering, Nanjing University, Nanjing 210093, P. R. China

**Chemicals and materials.** Trifluoroacetic acid (TFA), formic acid (FA), 2,5-dihydroxybenzoic acid (2,5-DHB), trypsin (from bovine pancreas, TPCK treated), 4-nitrophenyl phosphate di(tris) salt (pNPP),  $\alpha$ -casein (from bovine milk),  $\beta$ -casein (from bovine milk), bovine serum albumin (BSA), formaldehyde (CH<sub>2</sub>O, 37 wt% in H<sub>2</sub>O), formaldehyde (CD<sub>2</sub>O, 20 wt% in D<sub>2</sub>O, 98 atom% D), and sodium cyanoborohydride (NaBH<sub>3</sub>CN) were all purchased from Sigma (St. Louis, MO). Titanium(IV) oxide (TiO<sub>2</sub>), niobium(V) oxide (Nb<sub>2</sub>O<sub>5</sub>), potassium carbonate (K<sub>2</sub>CO<sub>3</sub>), iron(III) chloride hexahydrate (FeCl<sub>3</sub>·6H<sub>2</sub>O), iron(II) chloride tetrahydrate (FeCl<sub>2</sub>·4H<sub>2</sub>O), and 10 % tetrabutyl ammonium hydroxide (TBAH) were obtained from Shanghai Reagent Co. (Shanghai, China). Acetonitrile (ACN) was chromatographic grade from Merck (Darmstadt, Germany), and all other chemicals were of analytical grade.

**Instrumentation and characterization.** Transmission electron microscopy (TEM) images were acquired on a JEM 1011 (JEOL 2010) electron microscope at an accelerating voltage of 200 kV. Scanning electron microscopy (SEM) was done on a Hitachi S-4800 field emission electron microscope at an accelerating voltage of 5 kV. UV-vis spectra were recorded on a UV-3600 spectrophotometer (Shimadzu, Kyoto, Japan). XRD patterns were collected on a ARL X'TRA X-ray diffractometer using a Cu-K $\alpha$  radiation ( $\lambda = 0.15405$  nm). X-ray photoelectron spectroscopy (XPS) analyses were carried out on a PHI5000 VersaProbe photoelectron spectrometer (ULVAC-PHI, Japan). Nitrogen adsorption-desorption isotherms were recorded on a Micromeritics ASAP 2020M automated sorption analyzer. The samples were degassed at 100 °C for 12 h.

Superconducting quantum interference device (SQUID, Quantum Design) magnetometer was used in the magnetic measurement at 300 K. Zeta potential was tested on a Nano-Z zeta potential analyzer (Malvern Instruments, USA). Fe elemental analysis was carried out on a J-A1100 ICP-AES system.

**Tryptic digestion of standard proteins.** 1 mg  $\alpha$ -,  $\beta$ -casein, and BSA were respectively dissolved in 1 mL 50 mM ammonium bicarbonate buffer solution (pH=8.1), denatured in 100 °C for 5 min and incubated with trypsin at the enzyme-to-substrate ratio of 1:20 (w/w) in water bath at 37 °C for 16 h.

**Adsorption of *p*-nitrophenylphosphate (pNPP) on layered materials, H<sup>+</sup>-stacked nanosheets and Fe<sub>3</sub>O<sub>4</sub>-TiNbNS series.** For each, 2 mg affinity material was mixed with 1 mL *p*-nitrophenylphosphate (pNPP) solution in 1 % (v/v) TFA 50 % (v/v) ACN at a concentration ranging from 0.02 mg/mL to 0.2 mg/mL. After vibration for 30 min, supernatant was collected by centrifugation at 12000g for 3 min (layered materials and H<sup>+</sup>-stacked nanosheets) or magnetic separation (Fe<sub>3</sub>O<sub>4</sub>-TiNbNS series), and then subjected to UV-vis analysis. The absorbance at the wavelength of 285 nm was monitored and selected as the data source for calculating the remaining pNPP in the supernatant according to the calibration curve.

**Mass spectrometry.** For MALDI-TOF MS analysis, 1  $\mu$ L resulting solution and 1  $\mu$ L 2,5-dihydroxybenzoic acid (DHB) solution (25 mg/ml in 70 % ACN) containing 1% H<sub>3</sub>PO<sub>4</sub> (v/v) were deposited in turn onto MALDI target.

MALDI-TOF MS experiments were performed on a 4800 Plus MALDI-TOF/TOF Mass Spectrometer (AB Sciex) equipped with a pulsed Nd:YAG laser operated at 355 nm in positive reflection mode. A ground-steel sample target with 384 spots was utilized. MS spectra were collected by the average of 16 sub-spectra acquired from the edge bias of DHB matrix spot with sum of 25 laser shots per sub-spectrum.

**Table S1.** Sequence information of phosphopeptides captured from tryptic digests of  $\beta$ -casein by Nb<sub>2</sub>O<sub>5</sub>, TiO<sub>2</sub>, HNb<sub>3</sub>O<sub>8</sub>, HTiNbO<sub>5</sub>, H<sup>+</sup>-stacked NbNS, H<sup>+</sup>-stacked TiNbNS, and Fe<sub>3</sub>O<sub>4</sub>-TiNbNS composites.

| <b>No.</b> | <b>Peptide sequence</b>               | <b>Number of phosphoryl groups</b> | <b>Observed m/z</b> |
|------------|---------------------------------------|------------------------------------|---------------------|
| $\beta$ 1  | FQ[pS]EEQQQTEDELQDK                   | 1                                  | 2061.80             |
| $\beta$ 2  | IEKFQ[pS]EEQQQTEDELQDK                | 1                                  | 2431.98             |
| $\beta$ 3  | FQ[pS]EEQQQTEDELQDKIHFP               | 1                                  | 2556.03             |
| $\beta$ 4  | RELEELNVPGEIVE[pS]L[pS][pS][pS]EESITR | 4                                  | 3122.16             |

[pS]: phosphorylated serine.

**Table S2.** Sequence information of phosphopeptides captured from tryptic digest of  $\alpha$ -casein by Fe<sub>3</sub>O<sub>4</sub>-TiNbNS-4-6.

| Peptide No. | Peptide sequence                          | Number of phosphoryl groups | Observed m/z |
|-------------|-------------------------------------------|-----------------------------|--------------|
| $\alpha$ 1  | TVDME[pS]TEVF                             | 1                           | 1237.59      |
| $\alpha$ 2  | TVD[Mo]ME[pS]TEVF                         | 1                           | 1253.60      |
| $\alpha$ 3  | TVDME[pS]TEVFTK                           | 1                           | 1466.75      |
| $\alpha$ 4  | TVD[Mo]E[pS]TEVFTK                        | 1                           | 1482.73      |
| $\alpha$ 5  | EQL[pS]T[pS]EENSKK                        | 2                           | 1539.69      |
| $\alpha$ 6  | VPQLEIVPN[pS]AEER                         | 1                           | 1660.89      |
| $\alpha$ 7  | DIGSE[pS]TEDQA[Mo]EDIK                    | 1                           | 1863.78      |
| $\alpha$ 8  | DIG[pS]E[pS]TEDQAMEDIK                    | 2                           | 1927.75      |
| $\alpha$ 9  | DIG[pS]E[pS]TEDQA[Mo]EDIK                 | 2                           | 1943.76      |
| $\alpha$ 10 | YKVPQLEIVPN[pS]AEER                       | 1                           | 1952.02      |
| $\alpha$ 11 | VNEL[pS]KDIG[pS]E[pS]TEDQAMEDIK           | 3                           | 2678.91      |
| $\alpha$ 12 | VNEL[pS]KDIG[pS]E[pS]TEDQA[Mo]EDIK        | 3                           | 2694.94      |
| $\alpha$ 13 | Q*MEAE[pS]I[pS][pS] [pS]EEIVPN[pS]VEAQK   | 5                           | 2703.87      |
| $\alpha$ 14 | QMEAE[pS]I[pS][pS][pS]EEIVPNPN[pS]VEQK    | 5                           | 2720.84      |
| $\alpha$ 15 | KEKVNEL[pS]KDIG[pS]E[pS]TEDQAMEDIKQ       | 3                           | 2935.98      |
| $\alpha$ 16 | KEKVNEL[pS]KDIG[pS]E[pS]TEDQA[Mo]EDIKQ    | 3                           | 2951.94      |
| $\alpha$ 17 | NANEEEEYSIG[pS][pS][pS]EE[pS]AEVATEEVK    | 4                           | 3007.97      |
| $\alpha$ 18 | NANEEEEY[pS]IG[pS][pS][pS]EE[pS]AEVATEEVK | 5                           | 3088.41      |

[pS]: phosphorylated serine;

[Mo]: oxidation on methionine;

\*Pyroglutamylation on the N-terminal Q.

**Table S3.** The percentage of 4 methylated products of peptide  $\beta$ 1 after different *in situ* labeling reaction times.

| <b>Reaction time</b> | <b>Percentage of 1-methyl-<math>\beta</math>1 (%)</b> | <b>Percentage of 2-methyl-<math>\beta</math>1 (%)</b> | <b>Percentage of 3-methyl-<math>\beta</math>1 (%)</b> | <b>Percentage of 4-methyl-<math>\beta</math>1 (%)</b> |
|----------------------|-------------------------------------------------------|-------------------------------------------------------|-------------------------------------------------------|-------------------------------------------------------|
| 10 min               | 2.37                                                  | 19.21                                                 | 8.67                                                  | 69.76                                                 |
| 20 min               | 2.18                                                  | 9.21                                                  | 7.22                                                  | 81.39                                                 |
| 30 min               | 2.72                                                  | 3.02                                                  | 6.11                                                  | 88.15                                                 |
| 40 min               | 2.03                                                  | 0.00                                                  | 4.91                                                  | 93.06                                                 |
| 50 min               | 0.61                                                  | 0.00                                                  | 6.00                                                  | 93.39                                                 |
| 60 min               | 3.09                                                  | 0.00                                                  | 2.82                                                  | 93.64                                                 |
| 2 h                  | 1.62                                                  | 0.00                                                  | 4.68                                                  | 93.70                                                 |
| 4 h                  | 2.34                                                  | 0.00                                                  | 4.69                                                  | 92.97                                                 |
| 8 h                  | 1.98                                                  | 0.00                                                  | 5.28                                                  | 92.74                                                 |
| 12 h                 | 1.79                                                  | 0.00                                                  | 3.53                                                  | 94.67                                                 |
| 24 h                 | 1.43                                                  | 0.00                                                  | 4.02                                                  | 94.55                                                 |

**Table S4** Sequence information of endogenous phosphopeptides captured from human serum by Fe<sub>3</sub>O<sub>4</sub>-TiNbNS-4-6 and labeled by CH<sub>2</sub>O and CD<sub>2</sub>O according the *in situ* labeling strategy.

| <b>No.</b> | <b>Peptide sequence</b> | <b>Number of phosphoryl groups</b> | <b>Original mass (m/z)</b> | <b>Labeled by CH<sub>2</sub>O (m/z)</b> | <b>Labeled by CD<sub>2</sub>O(m/z)</b> |
|------------|-------------------------|------------------------------------|----------------------------|-----------------------------------------|----------------------------------------|
| HS1        | D[pS]GEGDFLAEGGGV       | 1                                  | 1389.643                   | 1417.535                                | 1421.524                               |
| HS2        | AD[pS]GEGDFLAEGGGV      | 1                                  | 1460.704                   | 1488.572                                | 1492.553                               |
| HS3        | D[pS]GEGDFLAEGGGVR      | 1                                  | 1545.762                   | 1573.654                                | 1577.614                               |
| HS4        | AD[pS]GEGDFLAEGGGVR     | 1                                  | 1616.801                   | 1644.672                                | 1648.655                               |

[pS]: phosphorylated serine.



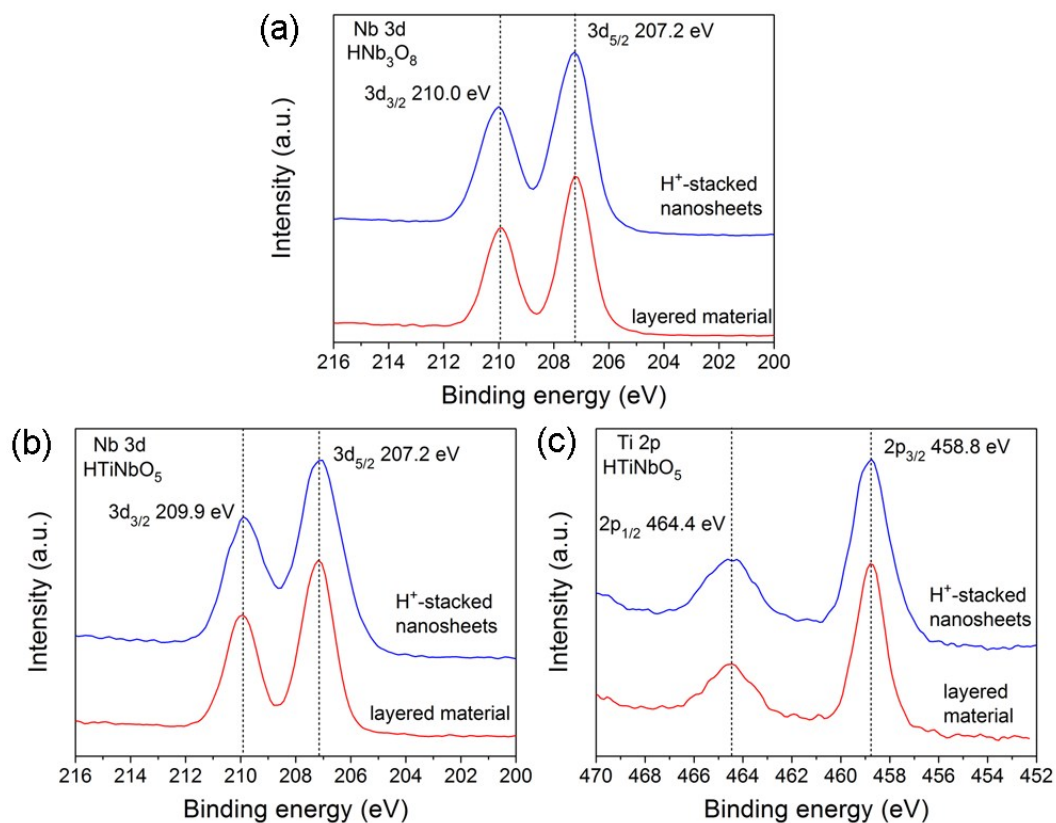

**Fig. S1** XPS spectra of (a) Nb 3d in layered oxide  $\text{HNb}_3\text{O}_8$ , (b) Nb 3d and (c) Ti 2p in layered oxide  $\text{HTiNbO}_5$  before and after exfoliation.

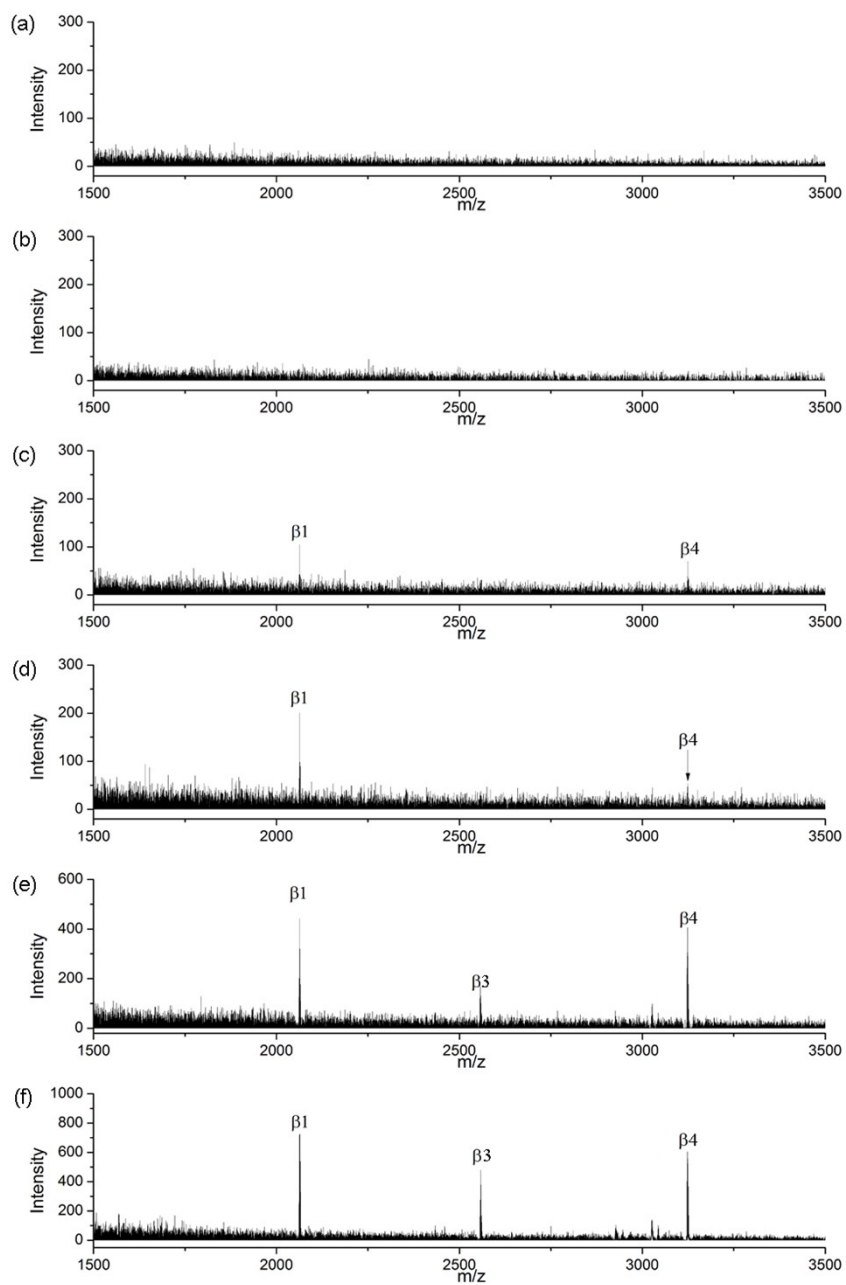

**Fig. S2** MALDI-TOF MS spectra of tryptic digests of  $\beta$ -casein (160 fmol) enriched by (a)  $\text{Nb}_2\text{O}_5$ , (b)  $\text{TiO}_2$ , (c)  $\text{HNb}_3\text{O}_8$ , (d)  $\text{HTiNbO}_5$ , (e)  $\text{H}^+$ -stacked NbNS, and (f)  $\text{H}^+$ -stacked TiNbNS.

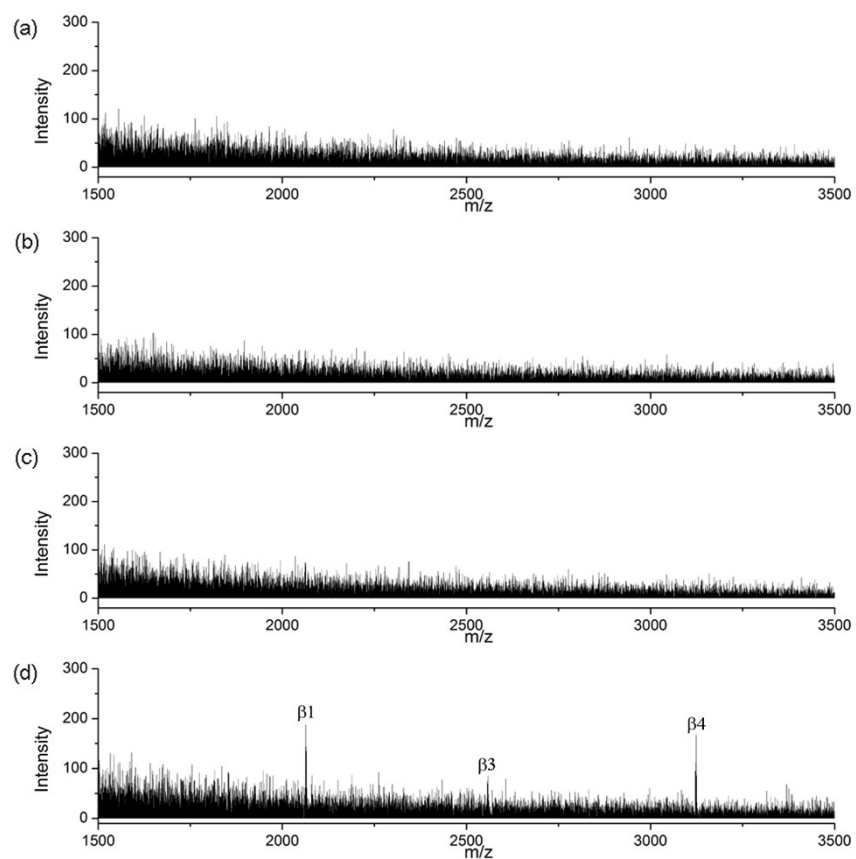

**Fig. S3** MALDI-TOF MS spectra of tryptic digests of  $\beta$ -casein (40 fmol) enriched by (a)  $\text{HNb}_3\text{O}_8$ , (b)  $\text{HTiNbO}_5$ , (c)  $\text{H}^+$ -stacked NbNS, and (d)  $\text{H}^+$ -stacked TiNbNS.

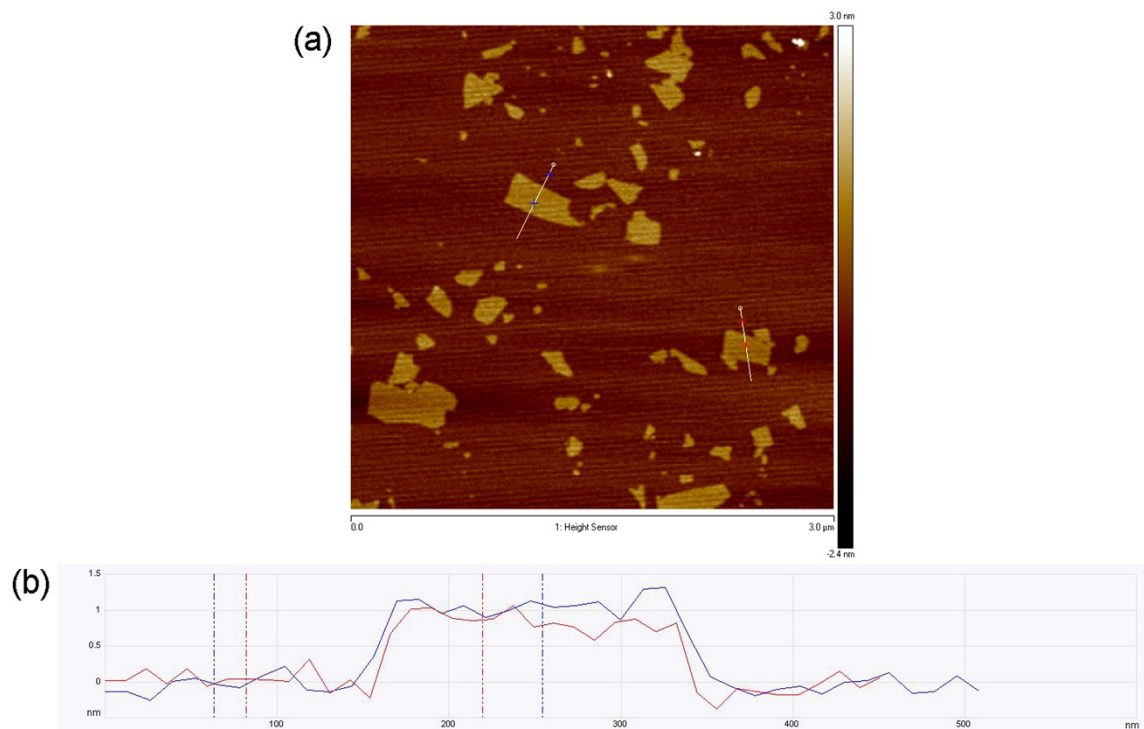

**Fig. S4** (a) AFM image of TiNbNS and (b) cross-section analysis along the chosen lines.

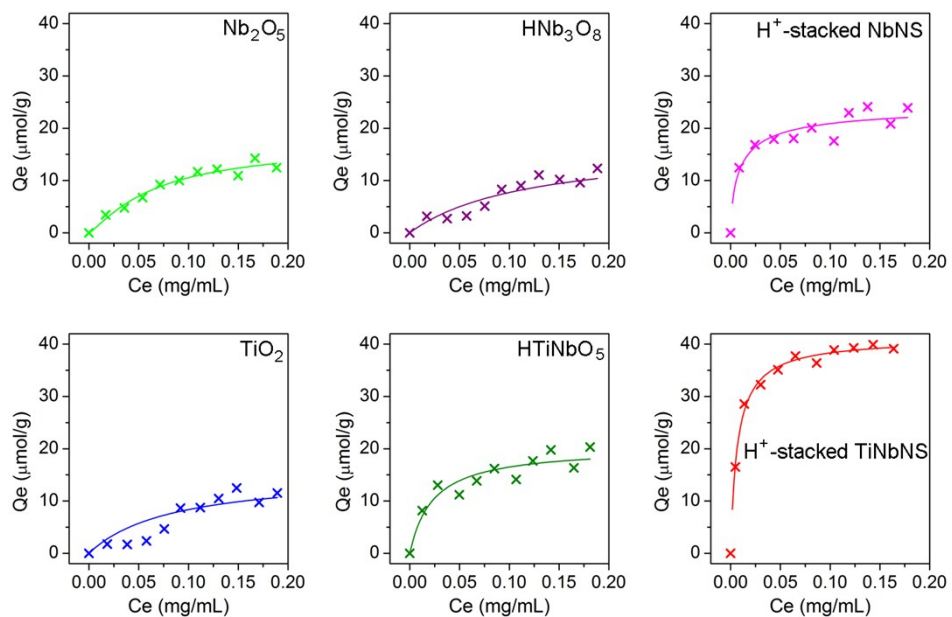

**Fig. S5** Saturated adsorption isotherm for pNPP adsorbed on Ti/Nb based bulk oxides, layered oxides and  $\text{H}^+$ -stacked nanosheets.  $C_e$ : equilibrium concentration;  $Q_e$ : amount adsorbed at equilibrium.

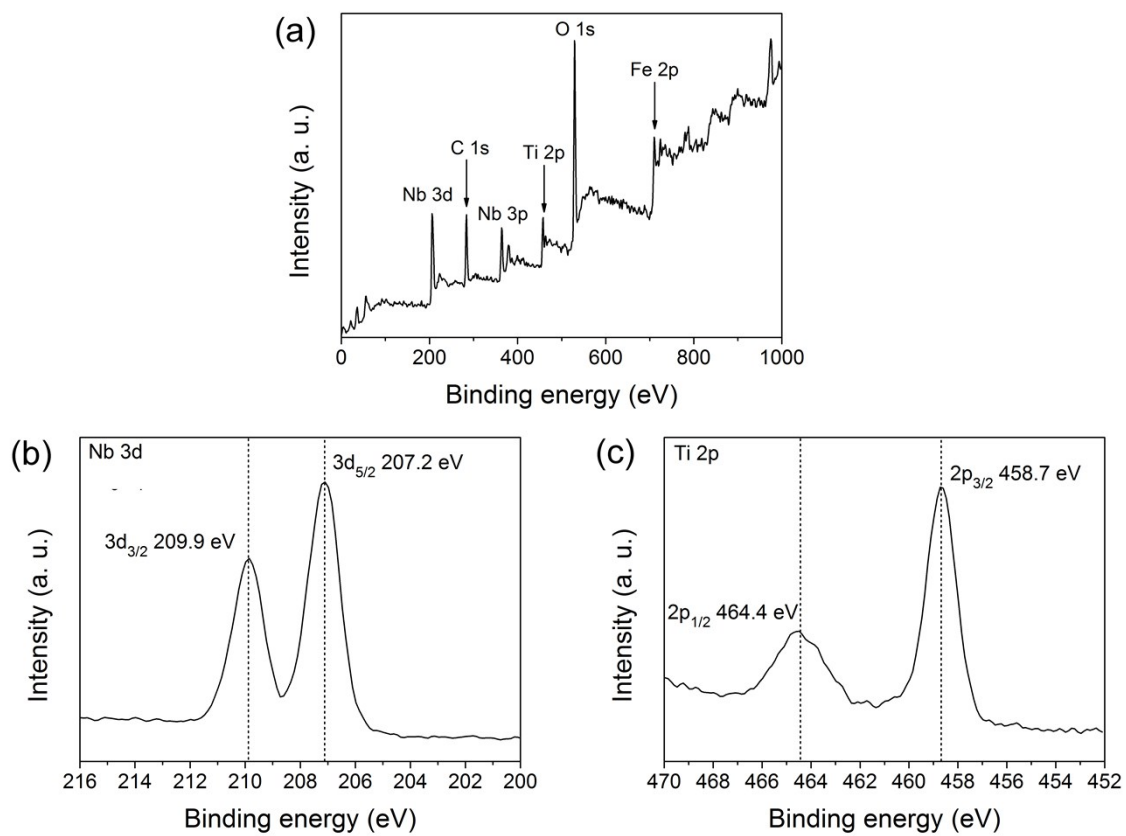

**Fig. S6** (a) XPS survey spectrum of  $\text{Fe}_3\text{O}_4\text{-TiNbNS-4-6}$ . High resolution XPS spectra of (b) Ti 2p and (c) Nb 3d.

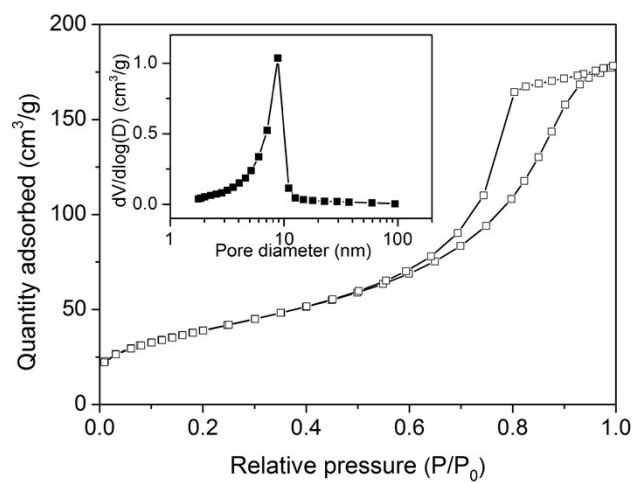

**Fig. S7** Nitrogen adsorption-desorption isotherms and pore size distribution curves (inset) calculated from the desorption branches of control Fe<sub>3</sub>O<sub>4</sub> nanocrystals.

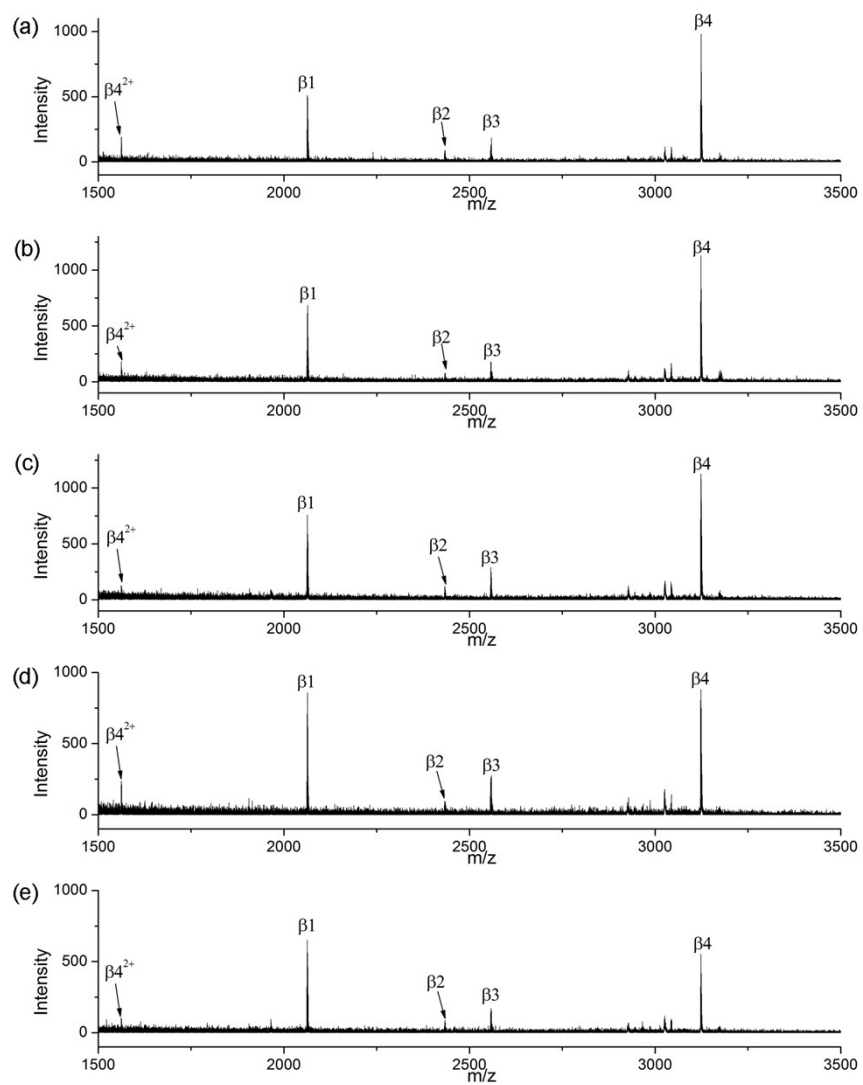

**Fig. S8** MALDI-TOF MS spectra of tryptic digests of  $\beta$ -casein (160 fmol) enriched by  $\text{Fe}_3\text{O}_4\text{-TiNbNS-}x\text{-}y$  (a-e are successively assigned to 1:6, 2:6, 4:6, 4:3, and 6:3).



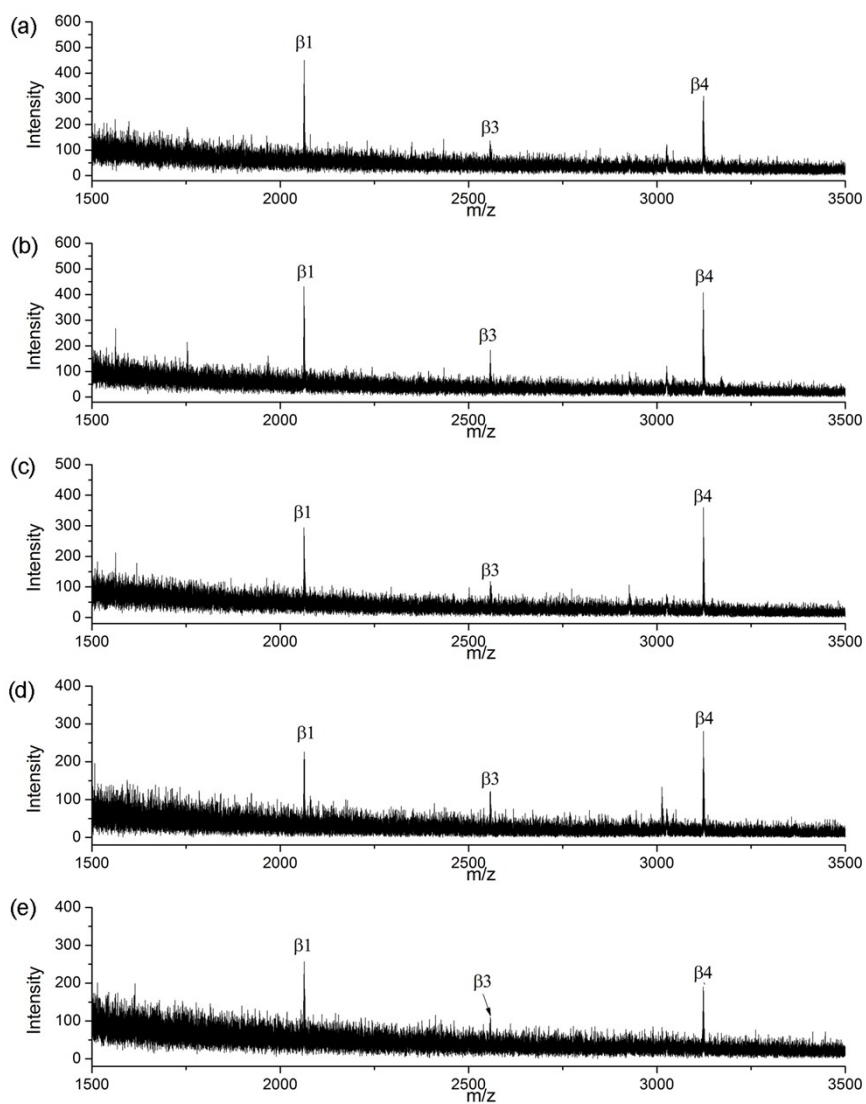

**Fig. S9** MALDI-TOF MS spectra of tryptic digests of  $\beta$ -casein (16 fmol) enriched by  $\text{Fe}_3\text{O}_4\text{-TiNbNS-}x\text{-}y$  (a-e are successively assigned to 1:6, 2:6, 4:6, 4:3, and 6:3).

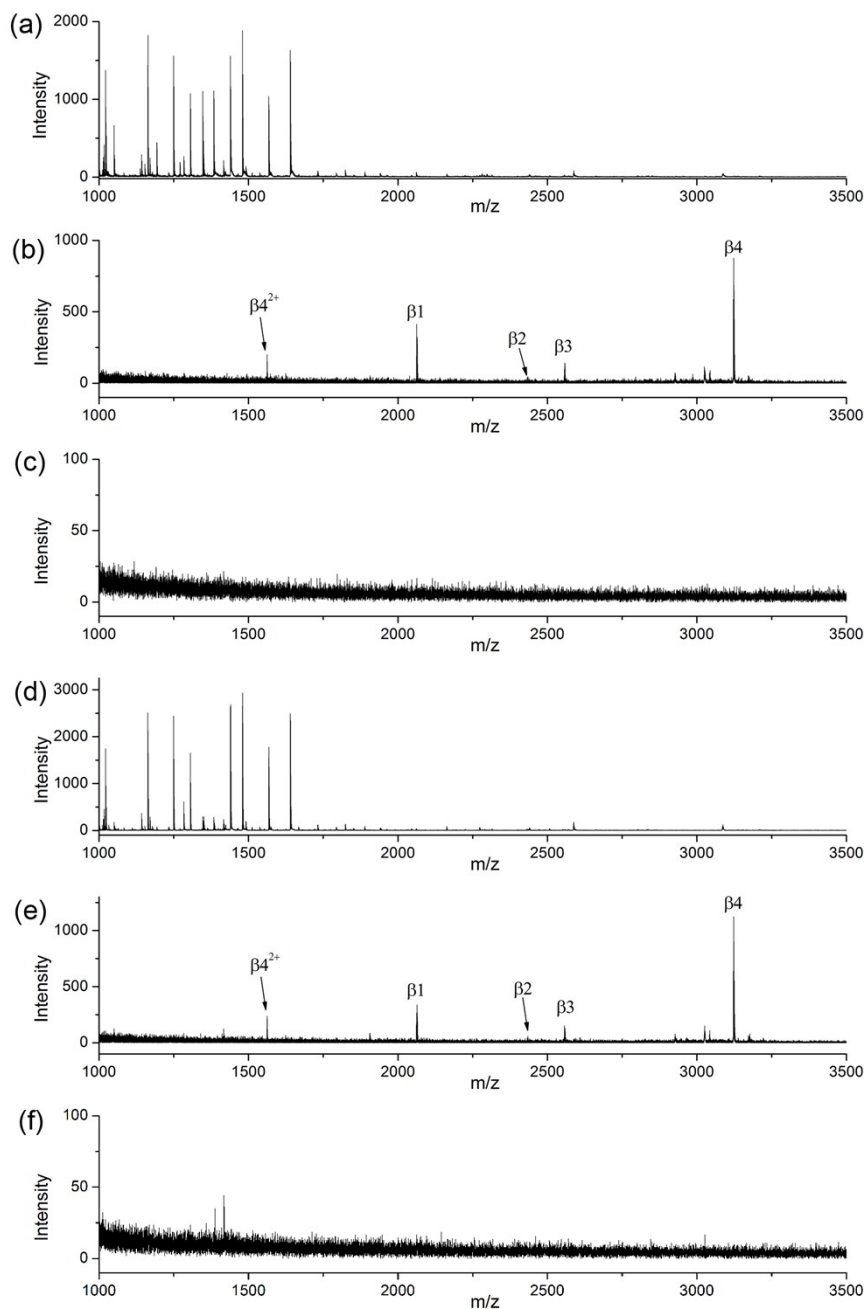

**Fig. S10.** MALDI-TOF MS spectra of tryptic digests of  $\beta$ -casein (160 fmol) mixed with BSA at mass ratio of (a, b and c) 1:10 and (d, e and f) 1:100. (a) and (d), direct analysis; (b) and (e), after enrichment by  $\text{Fe}_3\text{O}_4$ -TiNbNS-4-6; (c) and (f), after enrichment by layered oxide  $\text{HTiNbO}_5$ .

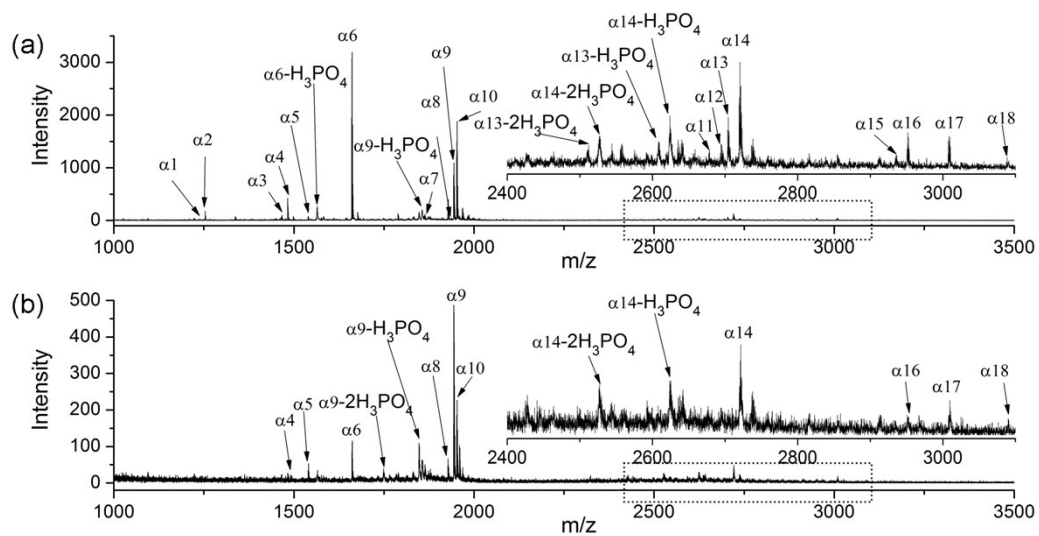

**Fig. S11** MALDI-TOF MS spectra of tryptic digests of  $\alpha$ -casein (1.6 pmol) enriched by (a)  $Fe_3O_4$ -TiNbNS-4-6 and (b) layered oxide  $HTiNbO_5$ .

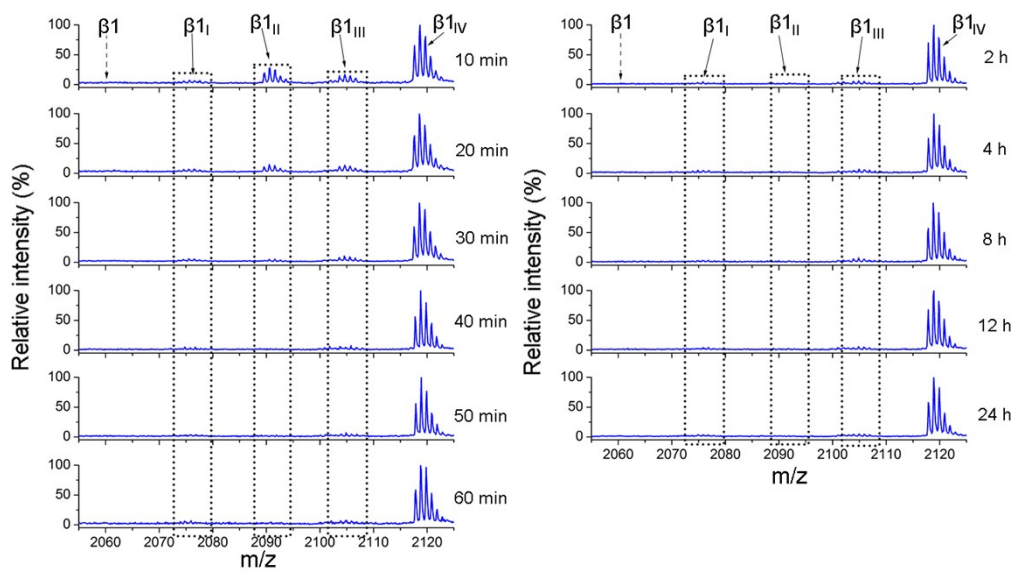

**Fig. S12** MALDI-TOF MS characterization of 4 products  $\beta 1_I$ ,  $\beta 1_{II}$ ,  $\beta 1_{III}$ , and  $\beta 1_{IV}$  after different *in situ* labeling reaction times.

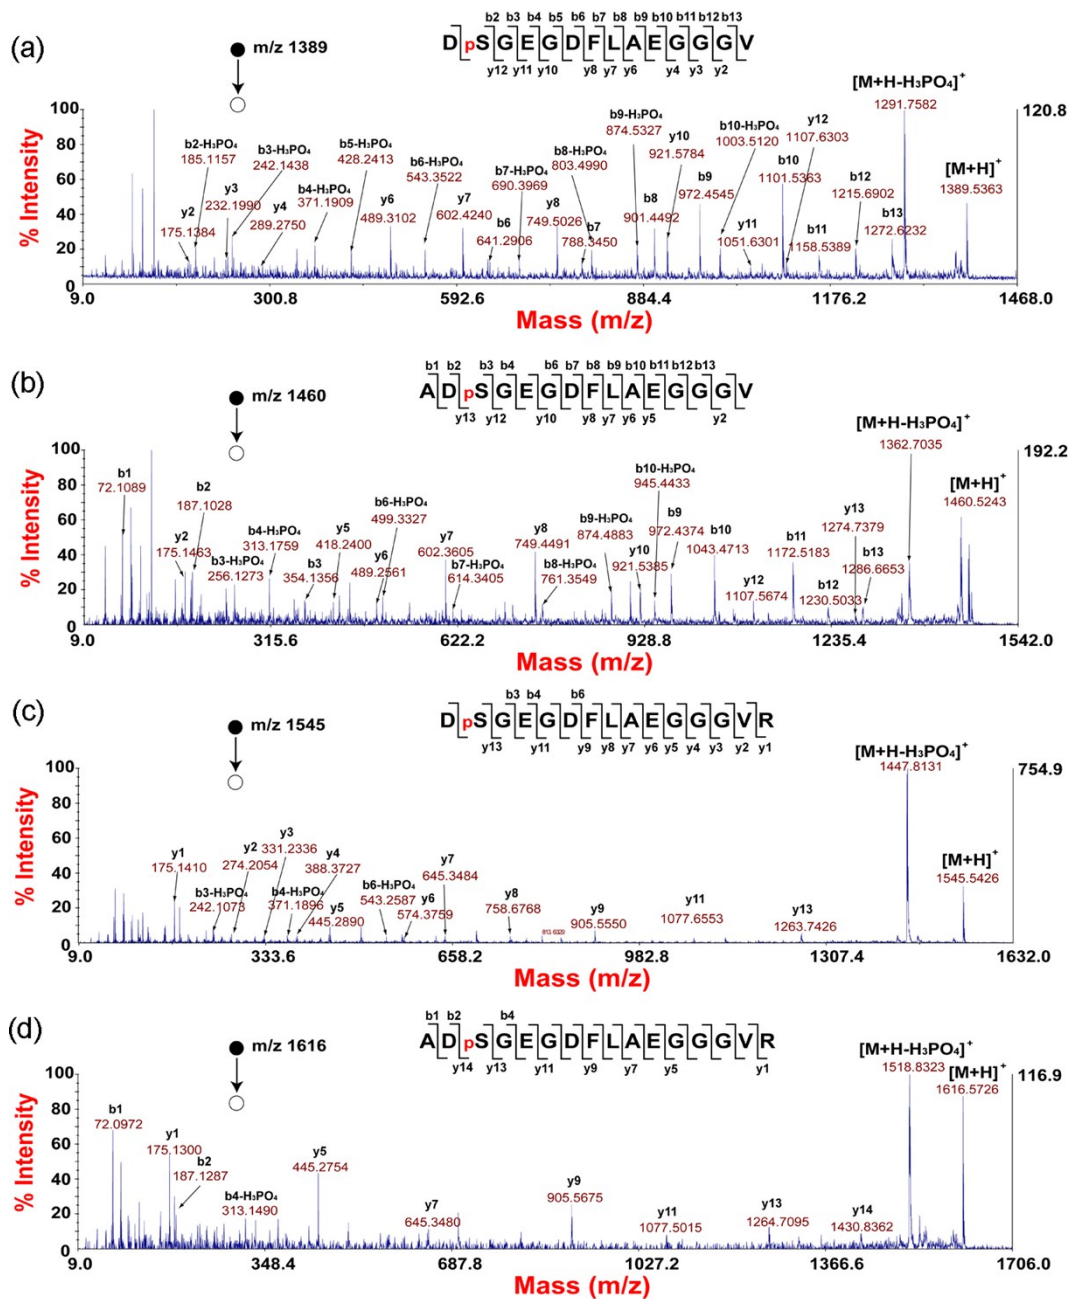

**Fig. S13** CID MS/MS spectra of the 4 phosphopeptides captured from human serum (a) m/z 1389, (b) m/z 1460, (c) m/z 1545 and (d) m/z 1616.

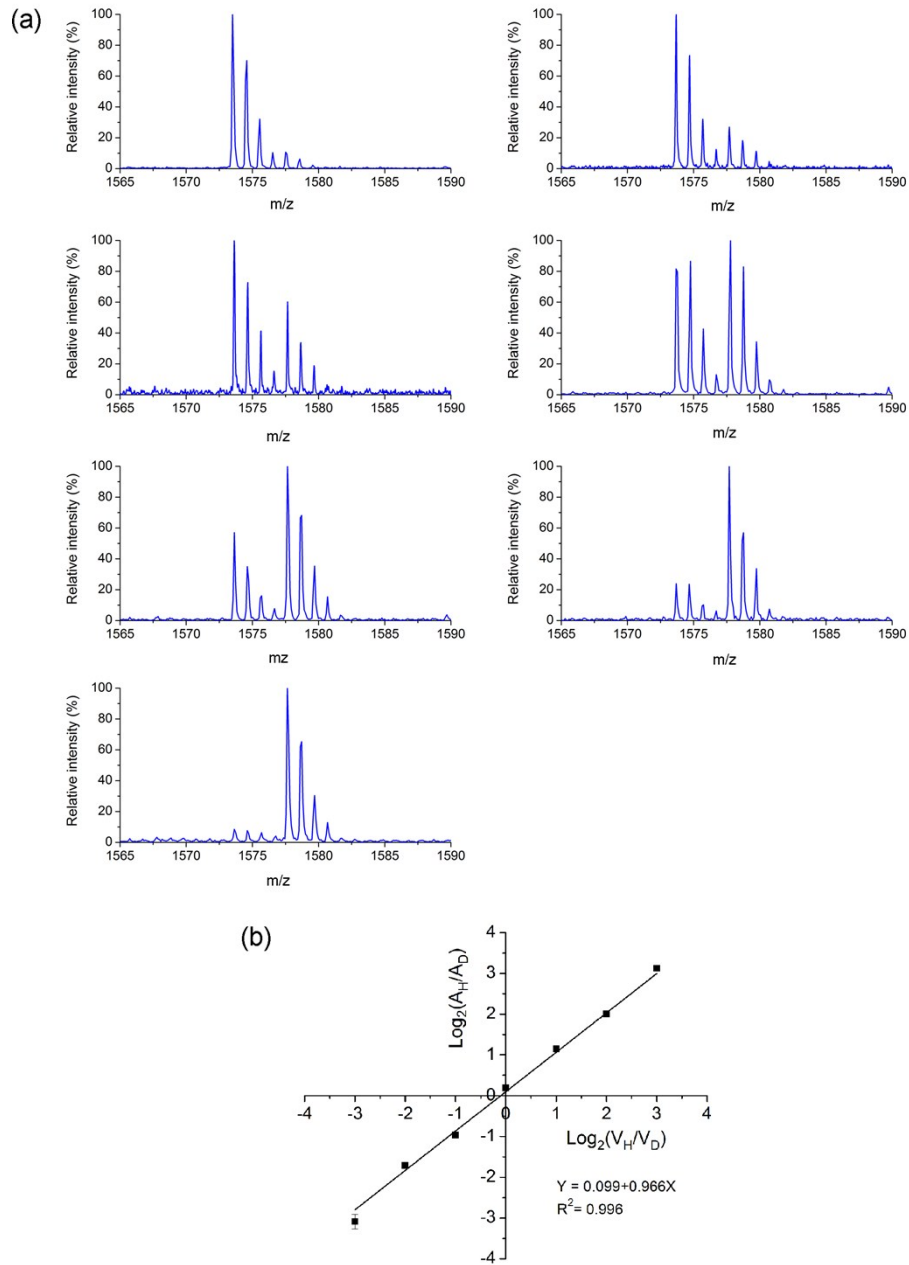

**Fig. S14** (a) Isotope cluster area ratios ( $A_H/A_D$ ) of light-labeled to heavy-labeled phosphopeptide HS3. The loading volume ratio ( $V_H/V_D$ ) for enrichment and isotope dimethyl labeling was set as 8:1, 4:1, 2:1, 1:1, 0.5:1, 0.25:1, and 0.125:1, respectively. (b) Linear relationship between the logarithms of  $A_H/A_D$  and  $V_H/V_D$ .
